# Supplementary material
Source: PubMed Central journal article supplement (PMC2974042)

Figure S1

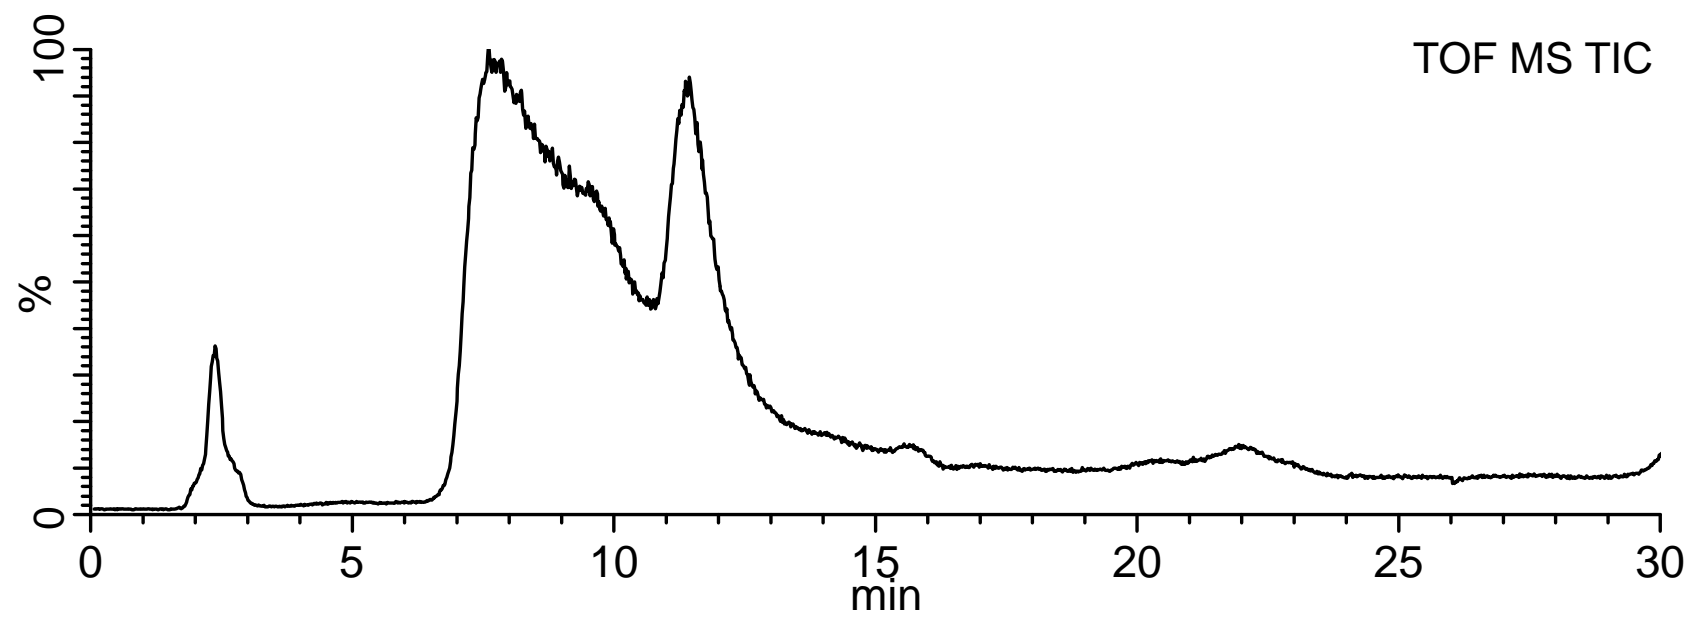

Figure S2

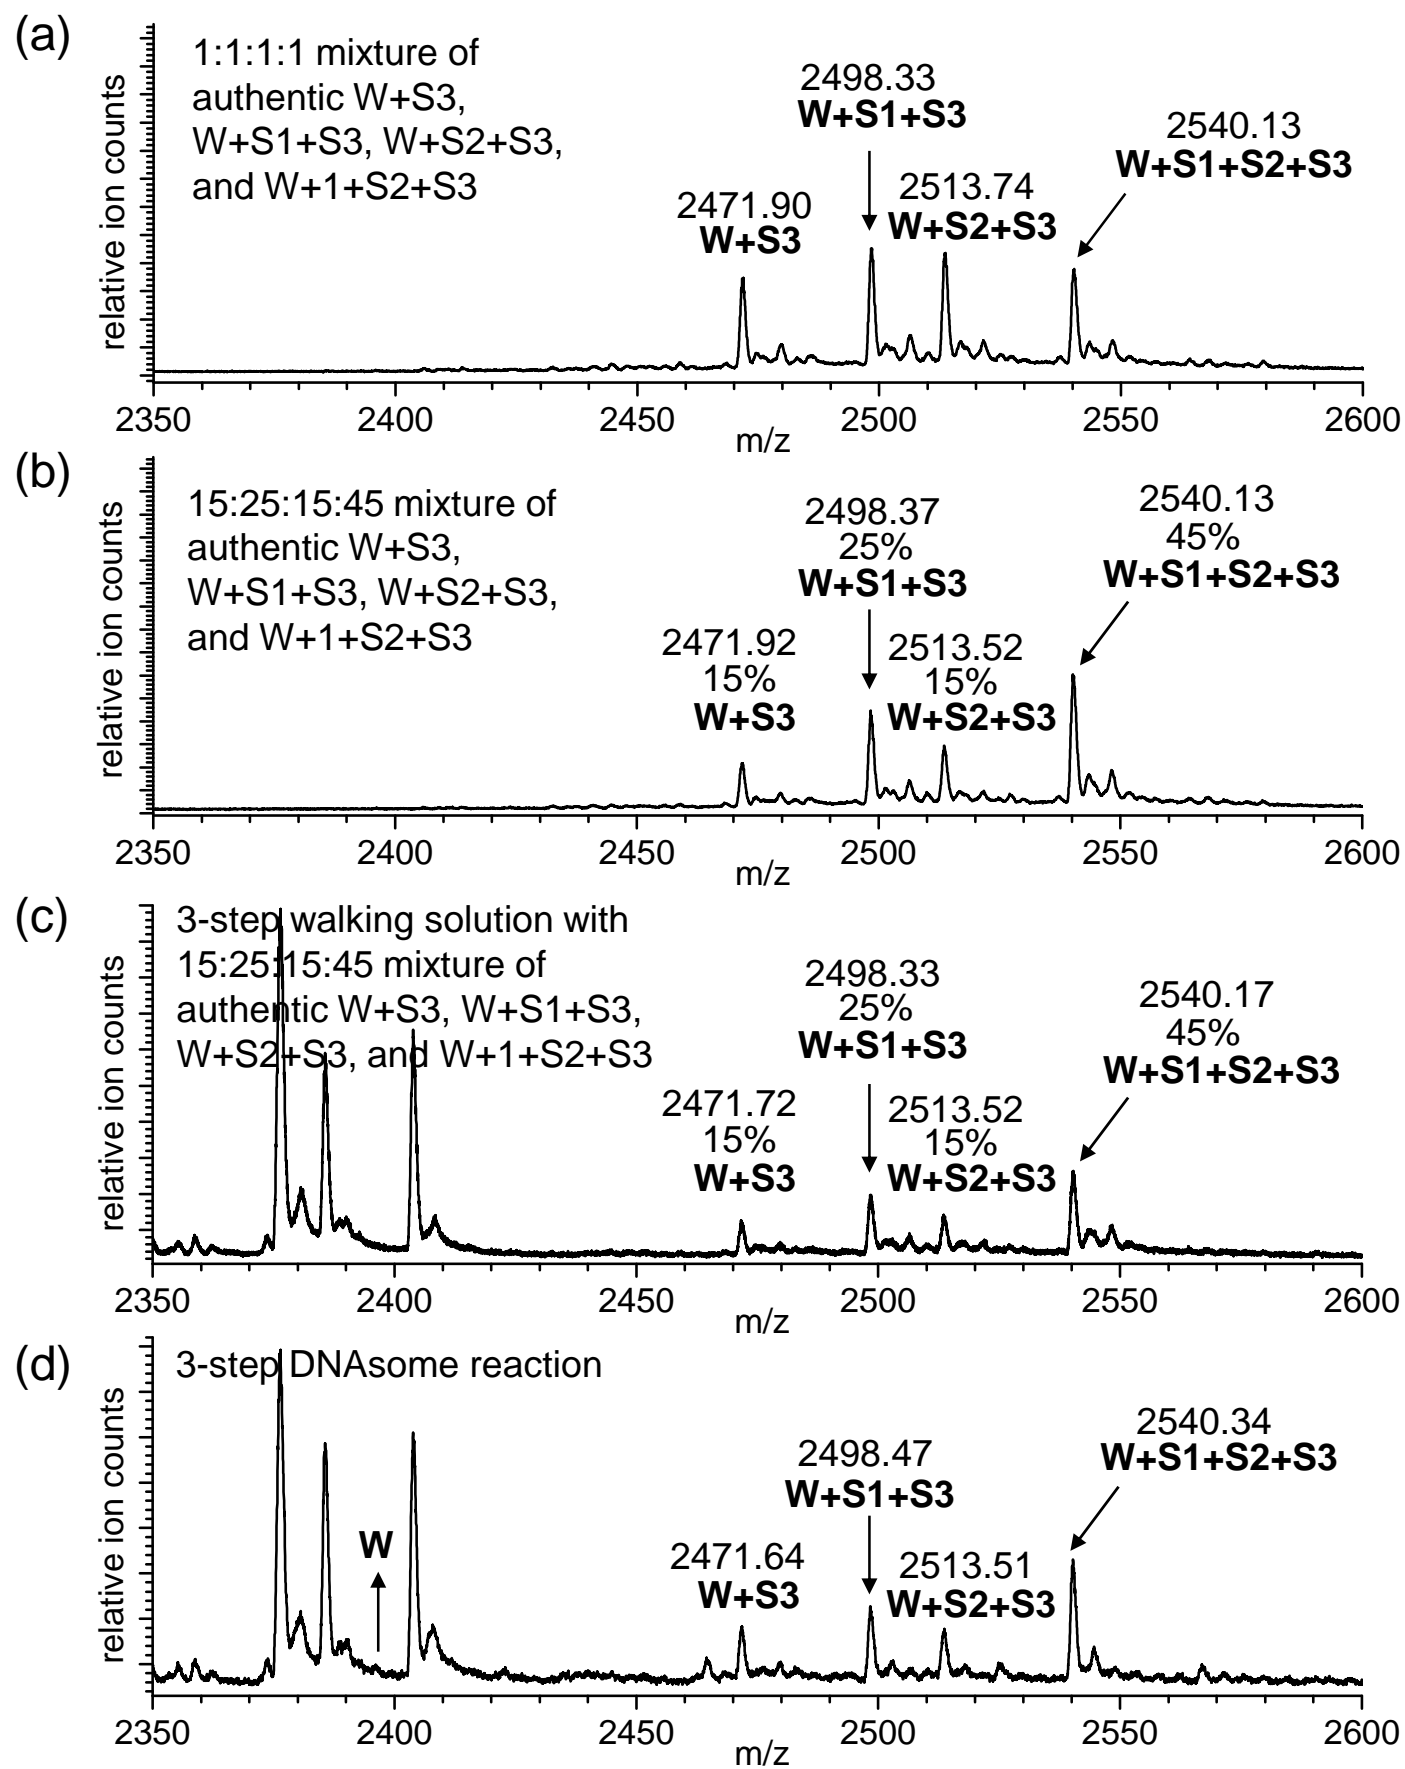

Figure S3

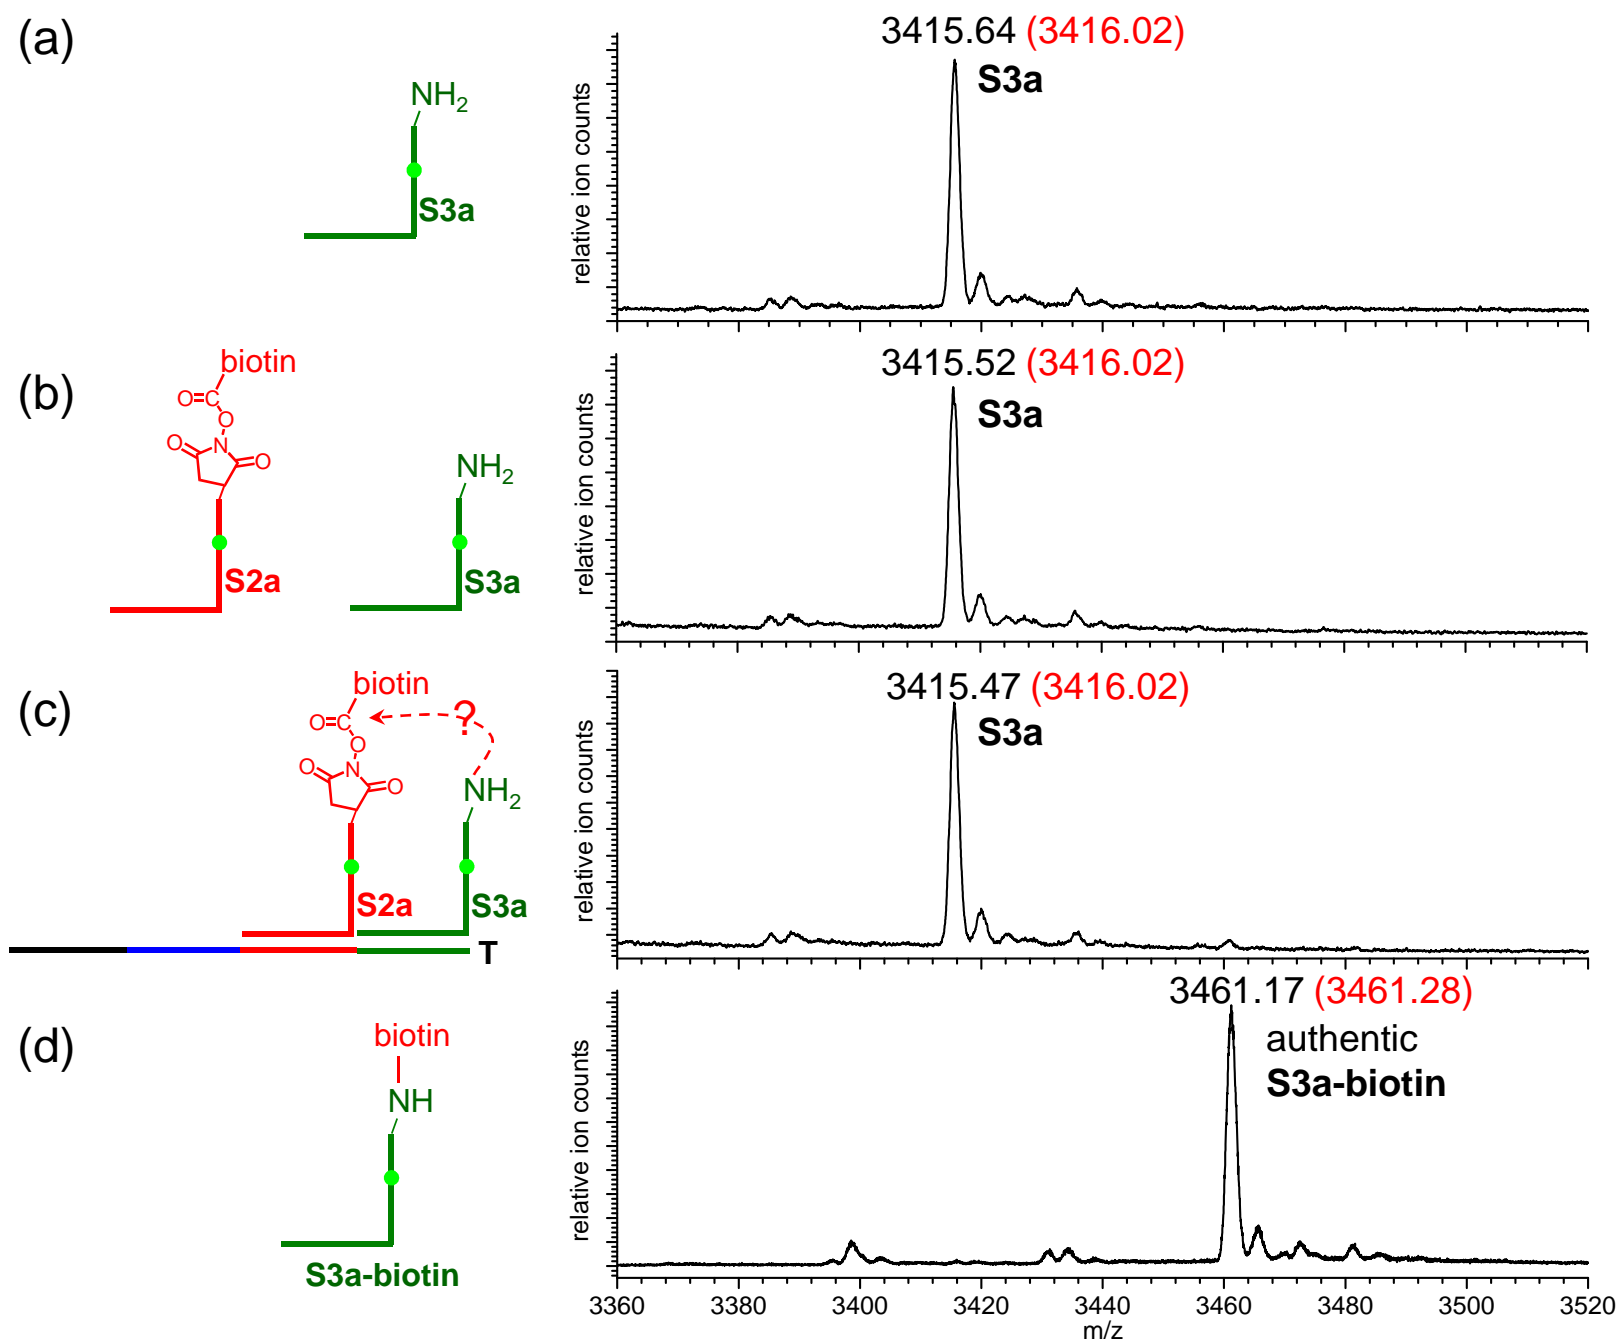

Figure 2 with observed and expected m/z values:

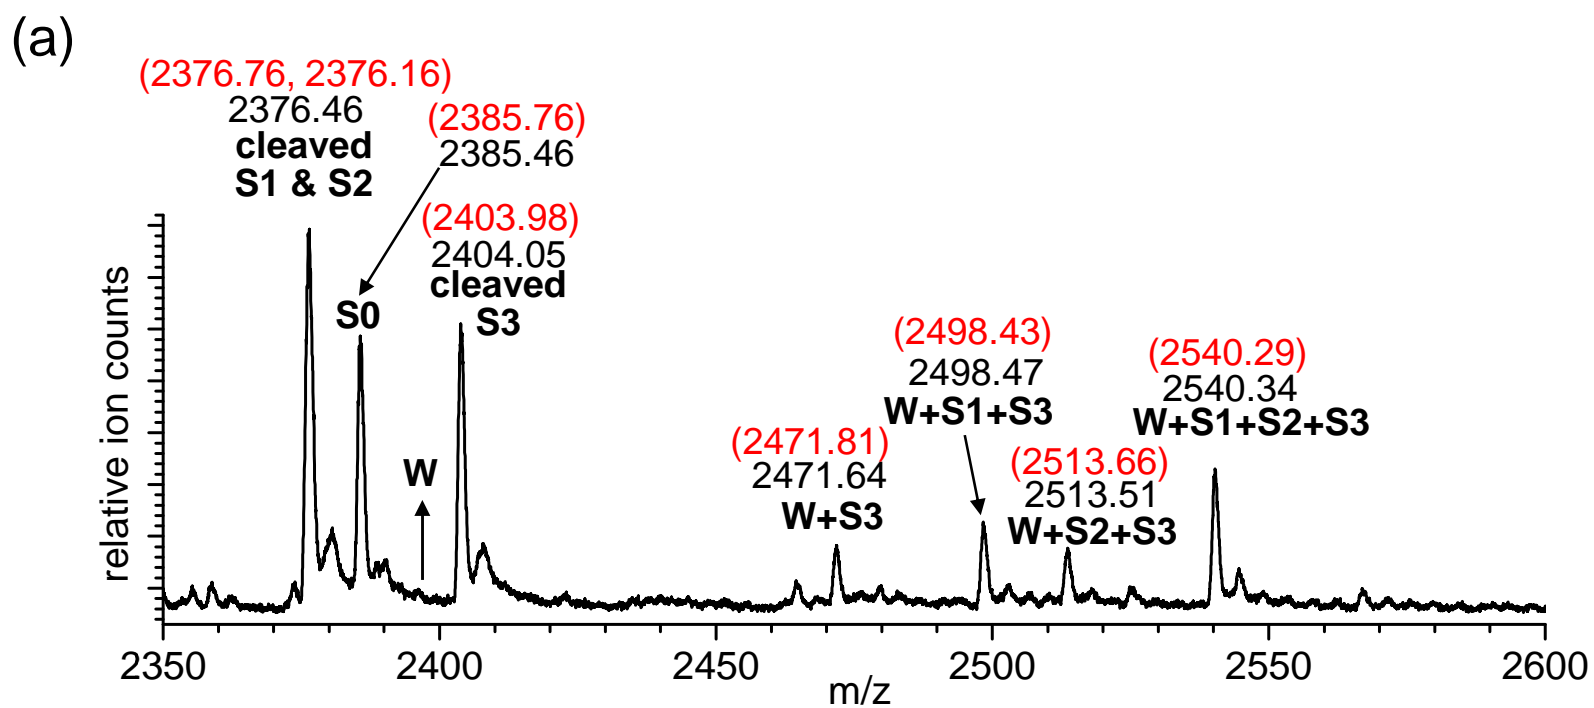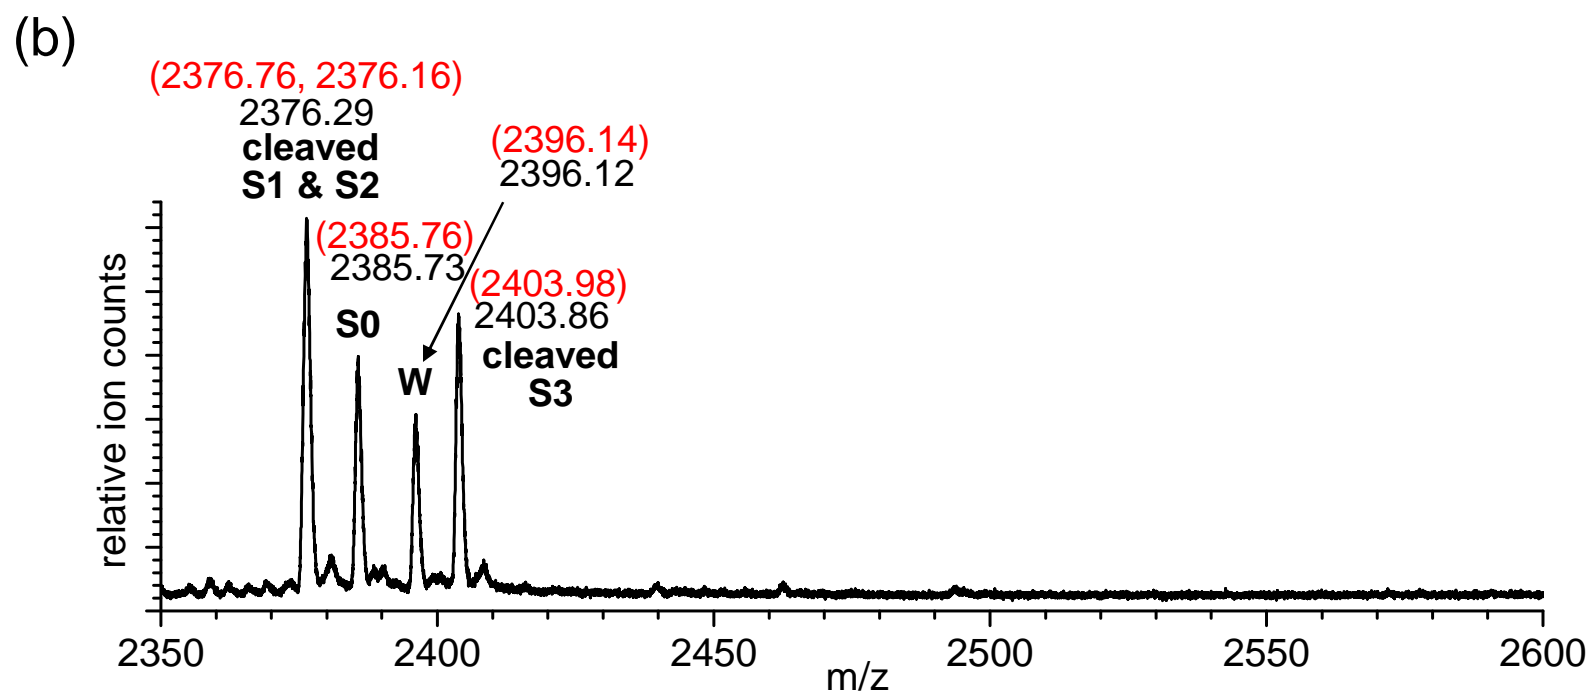

Figure 3 with observed and expected  $m/z$  values:

(a)

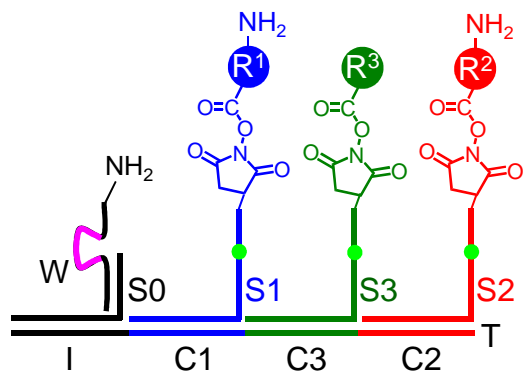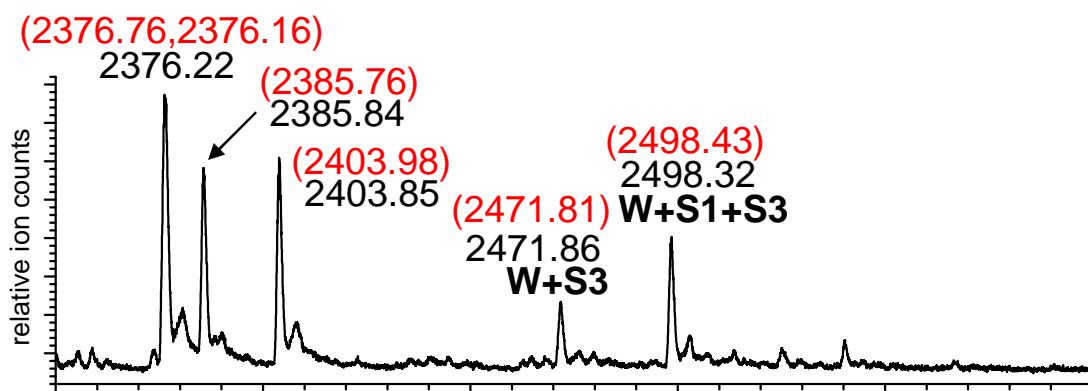

(b)

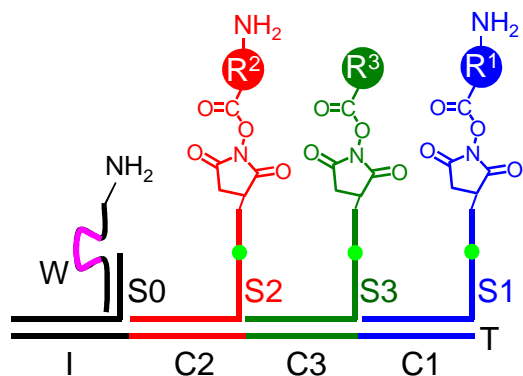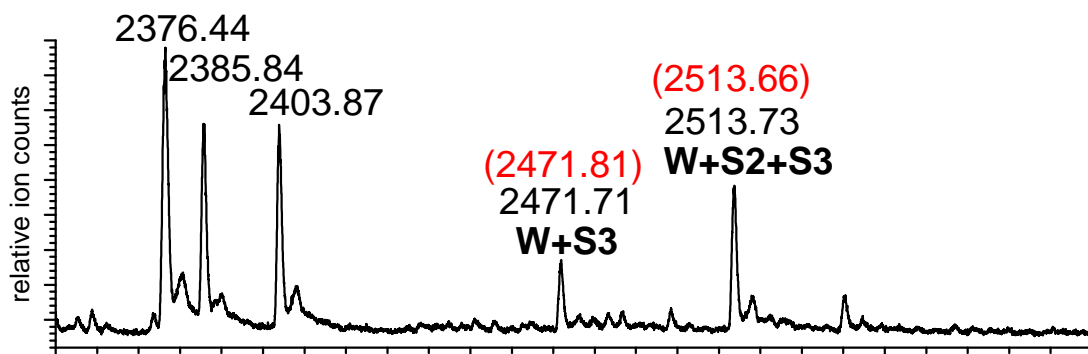

(c)

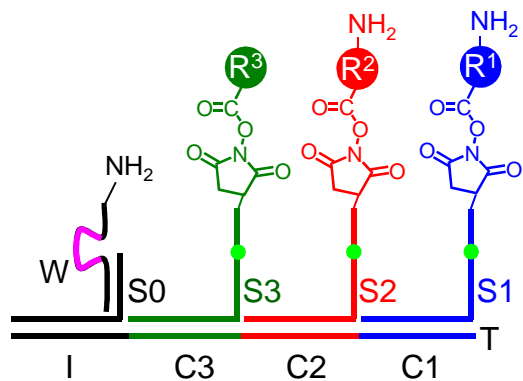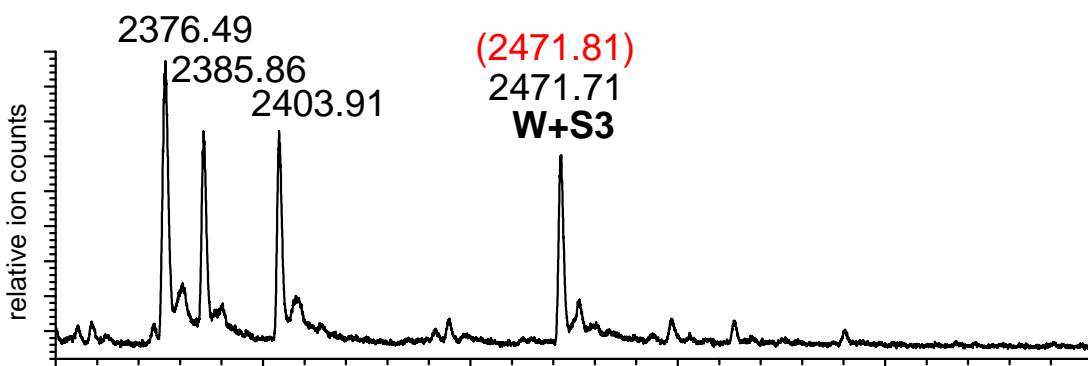

(d)

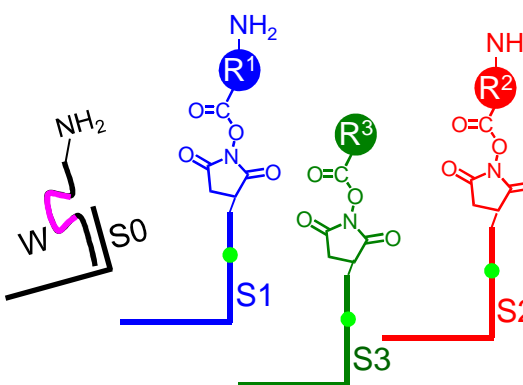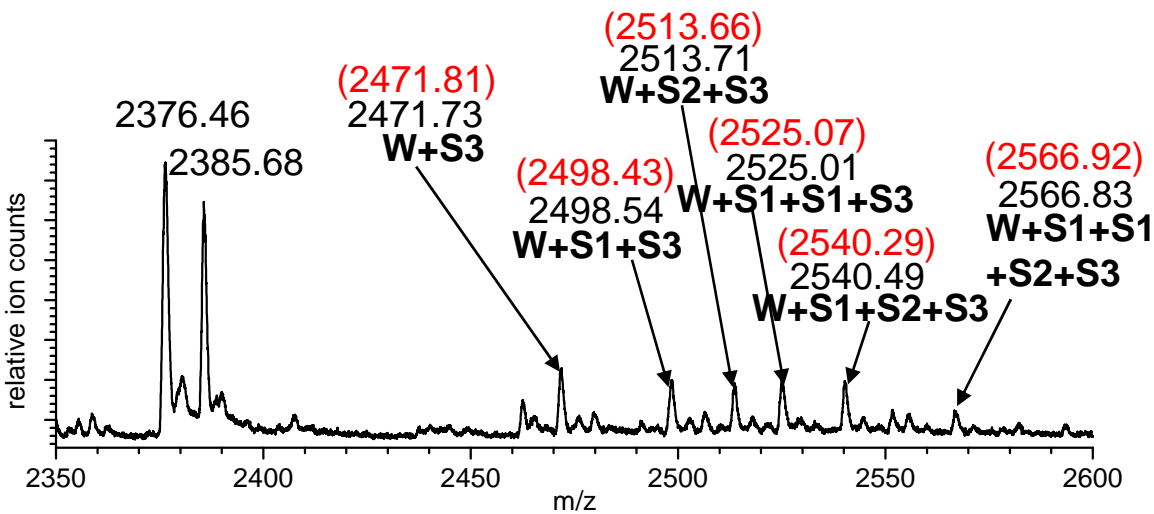

Supplement: NIHMS231238-supplement-3.pdf [file NIHMS231238-supplement-3.pdf]
