# Supplementary material
Source: PubMed Central journal article supplement (PMC2974042)

S1

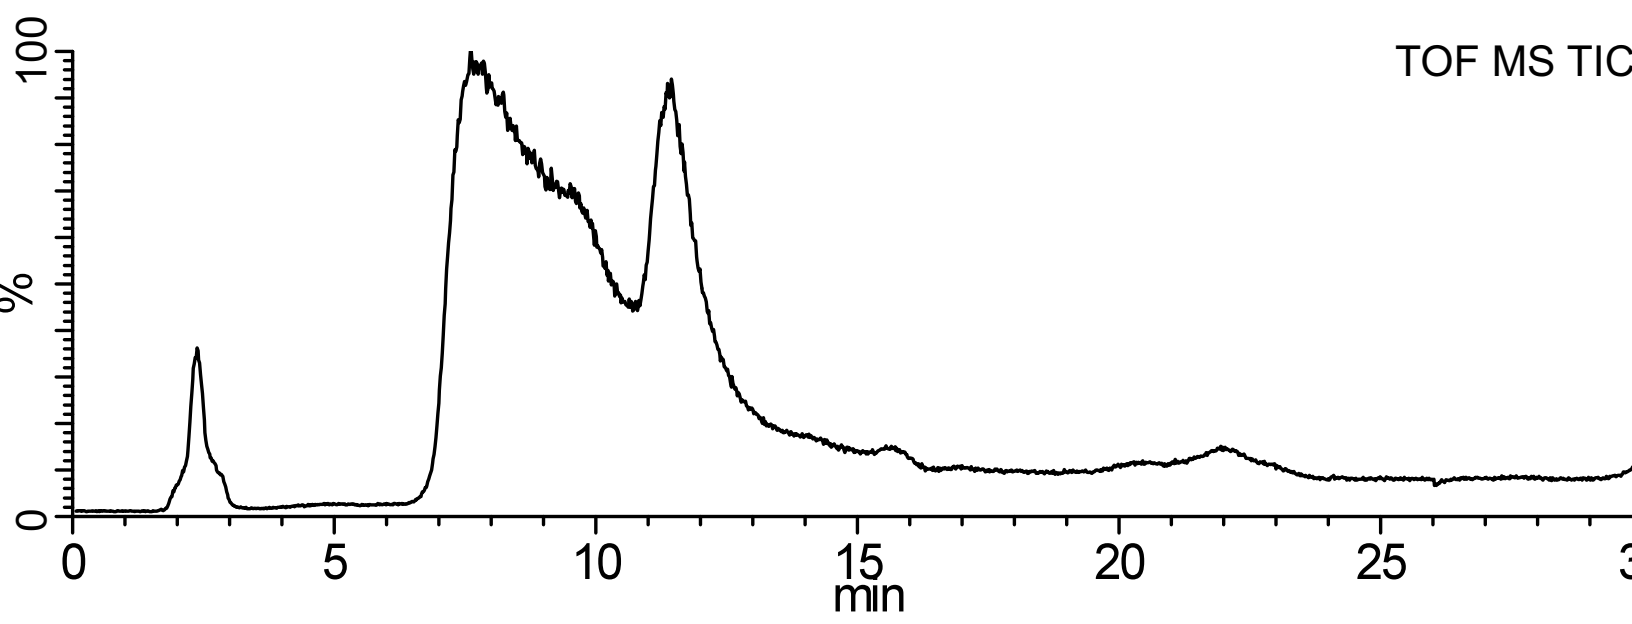

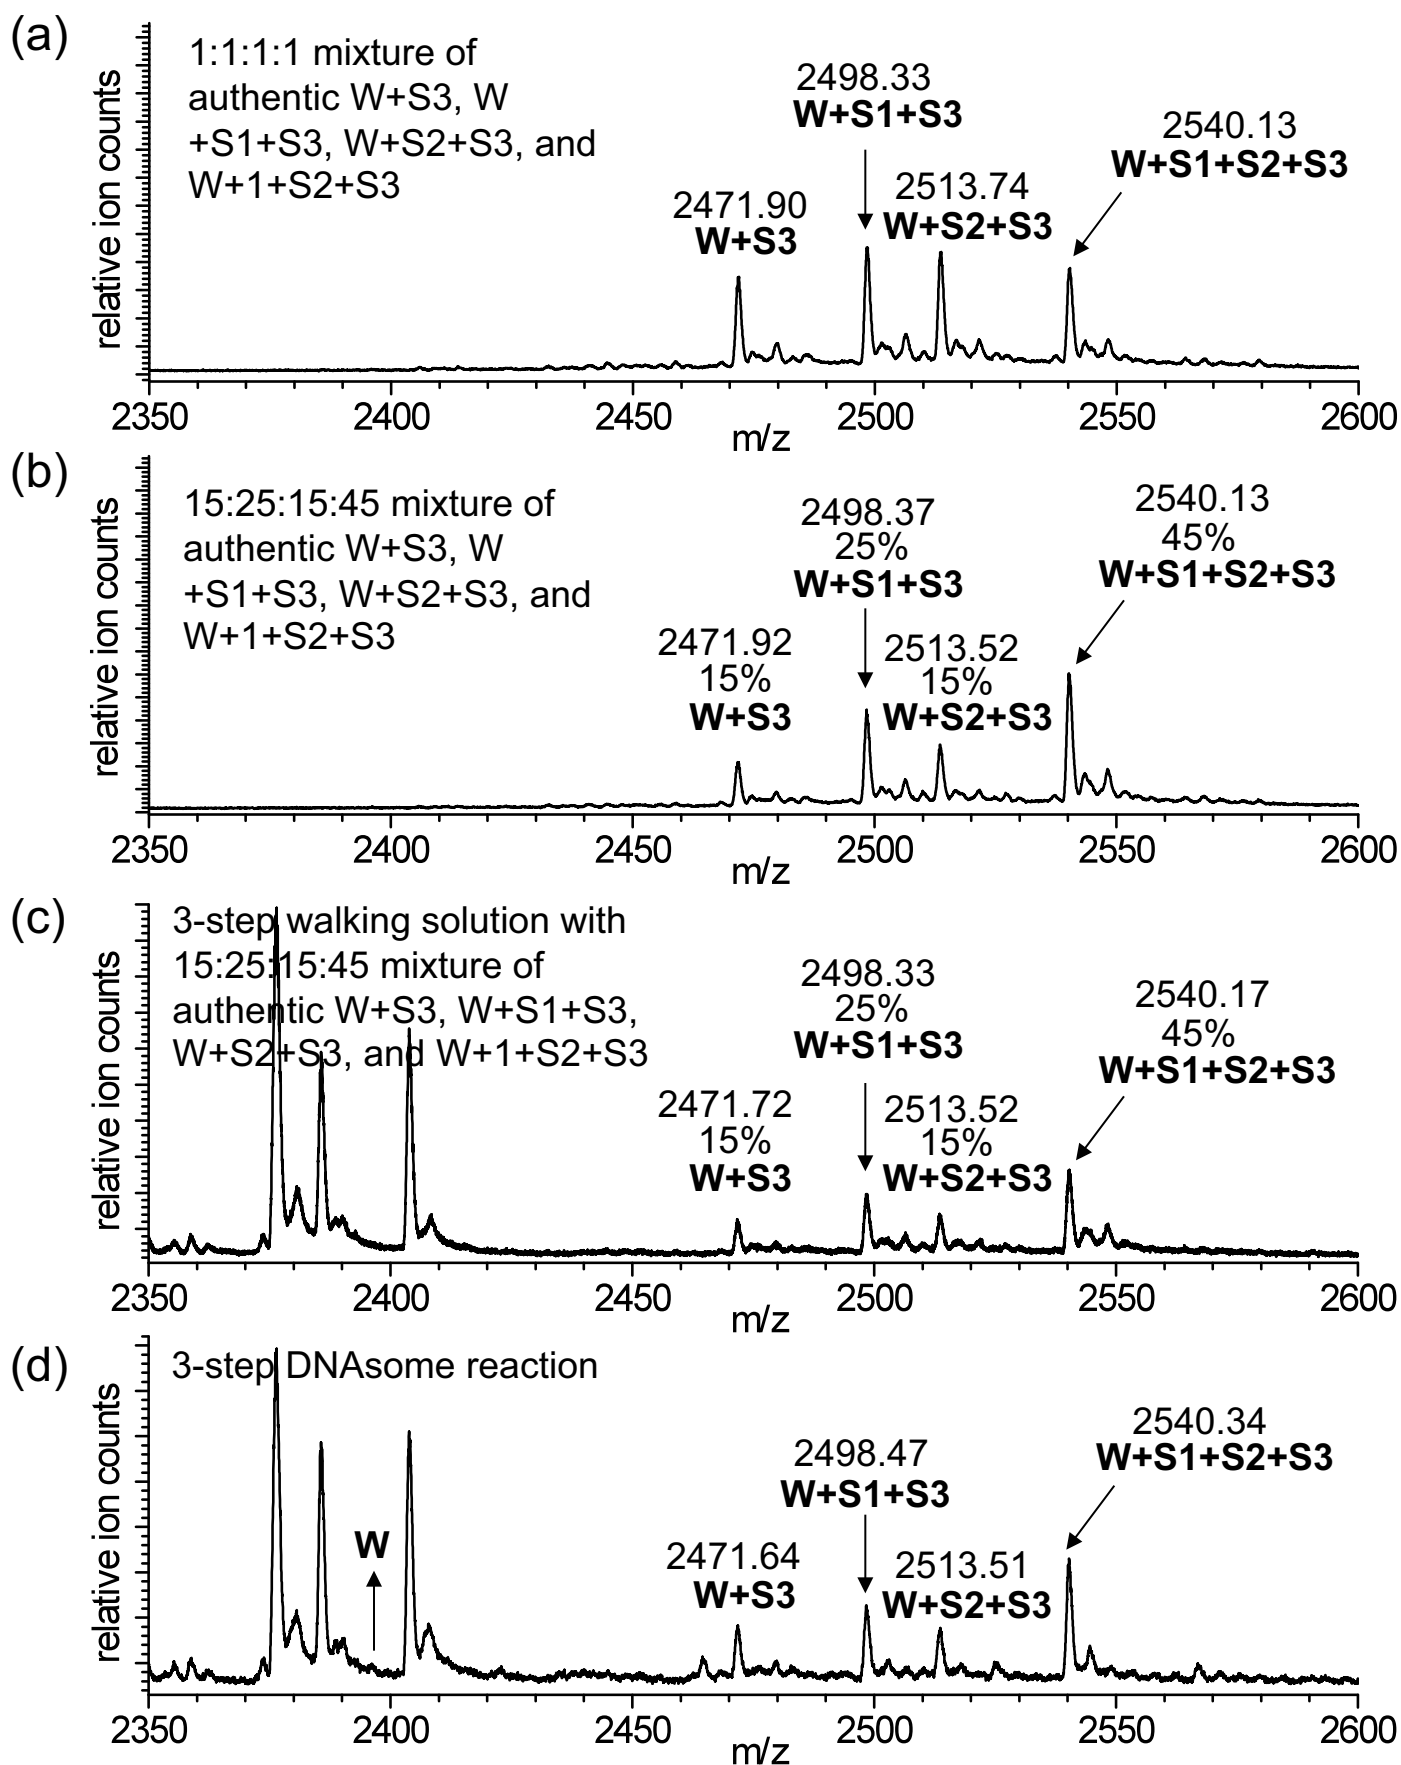

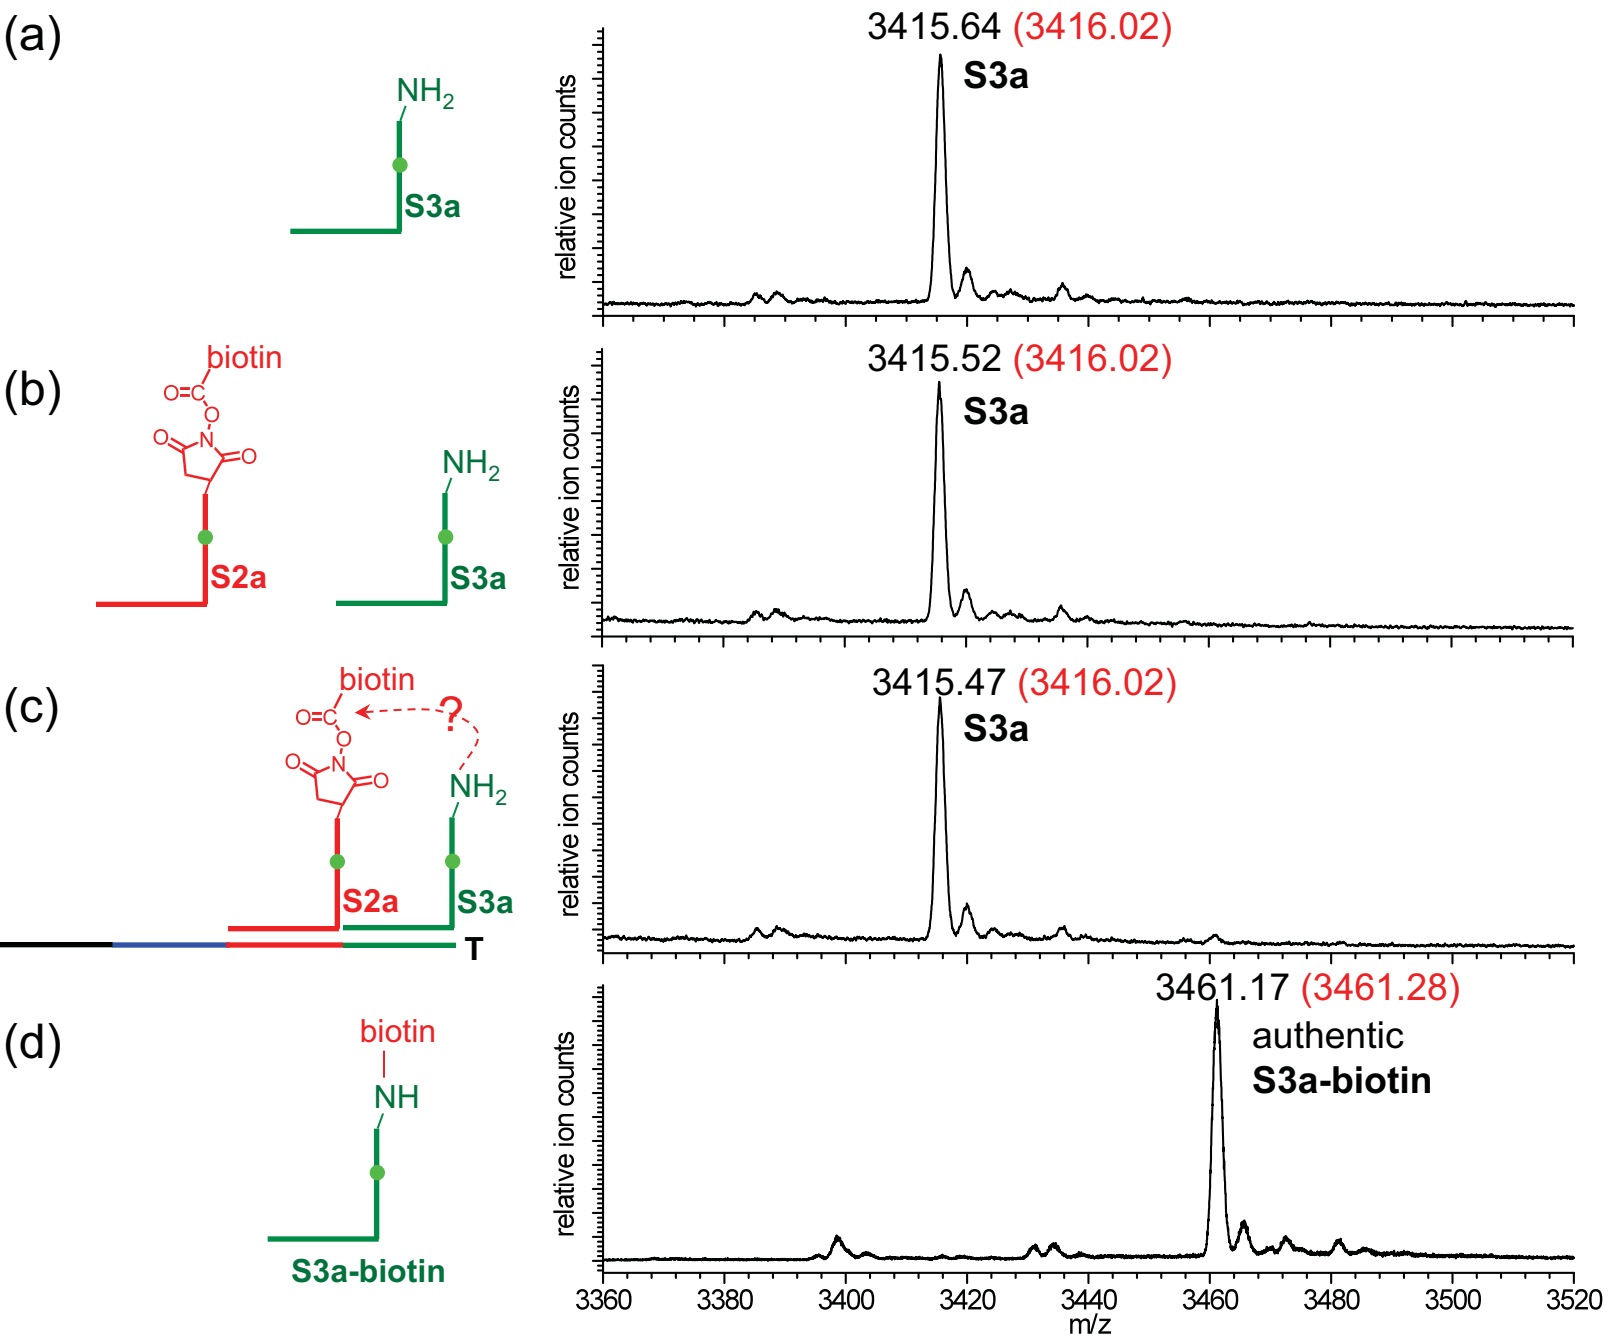

2 with observed and expected  $m/z$  values:

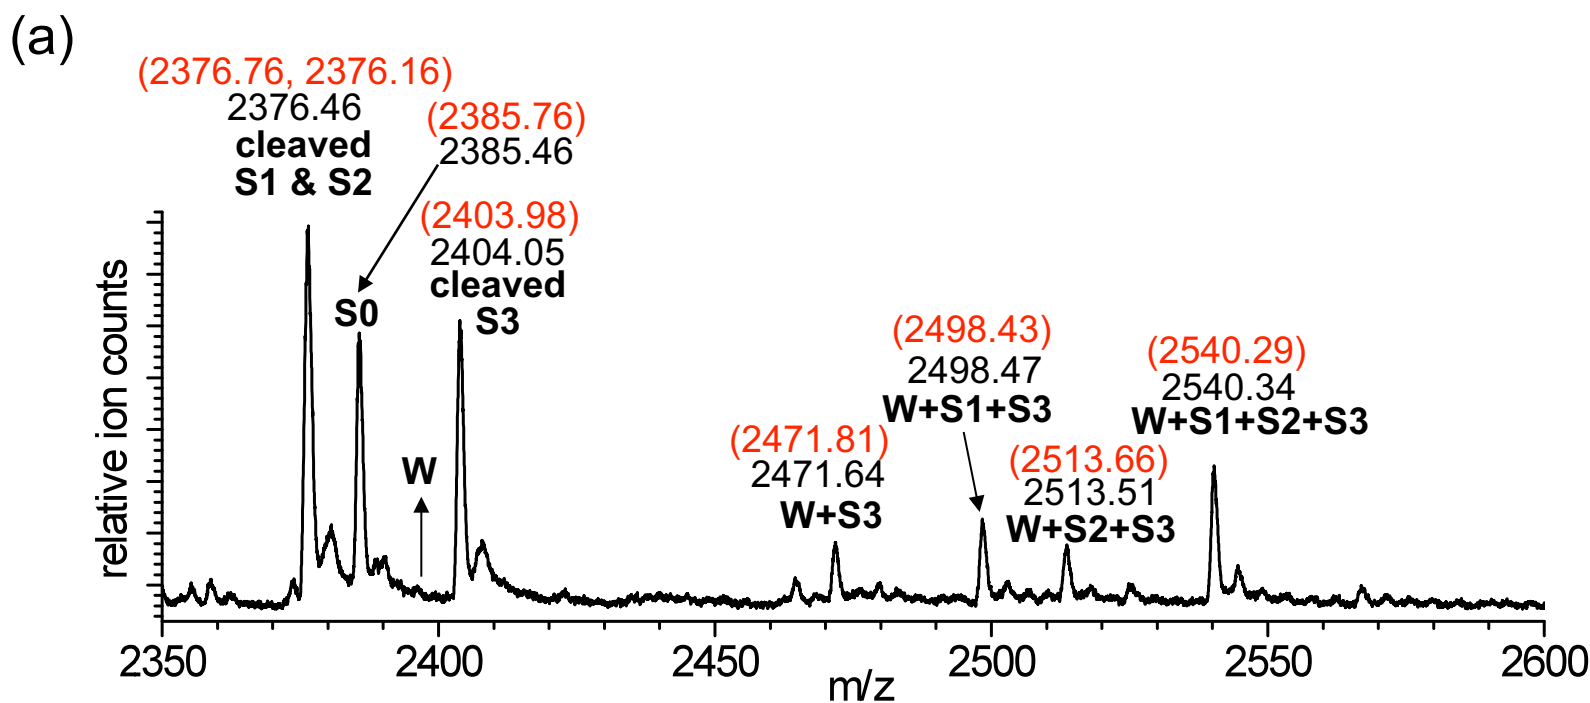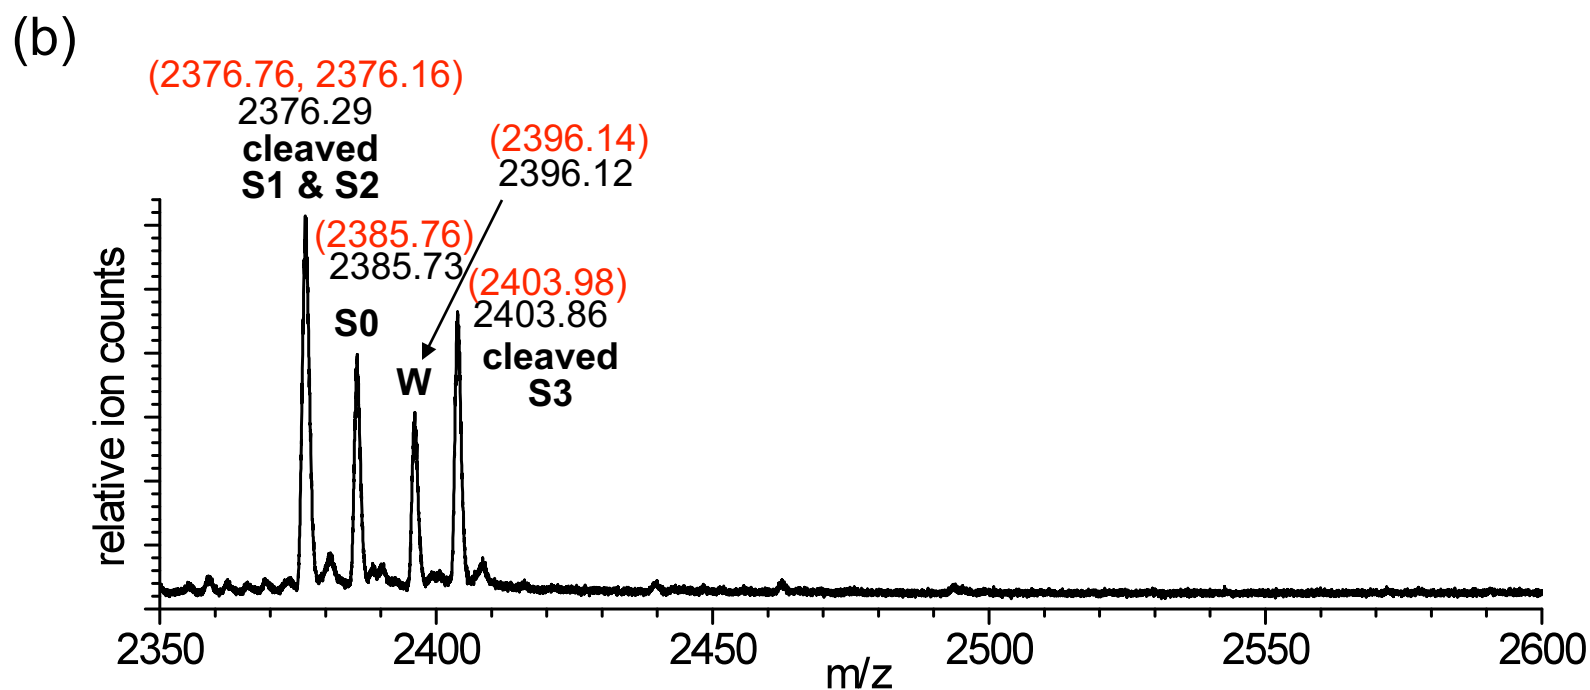

3 with observed and expected  $m/z$  values:

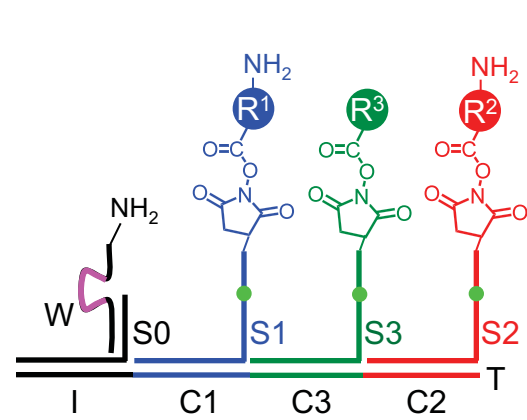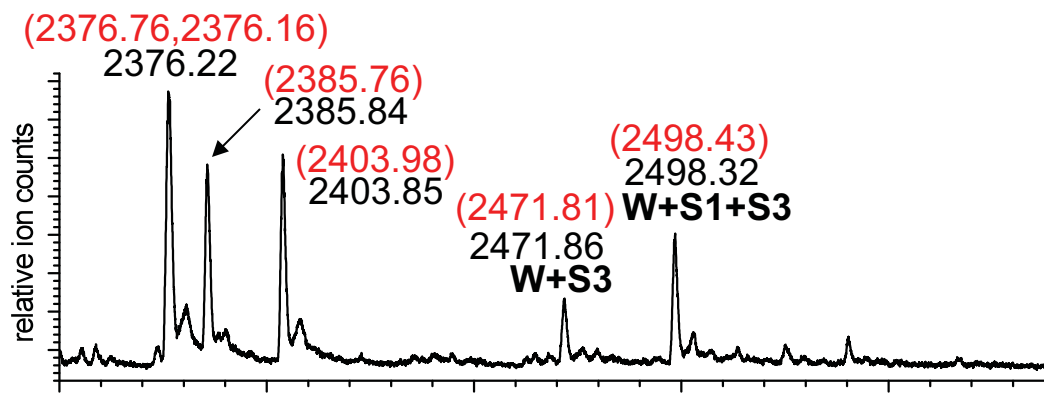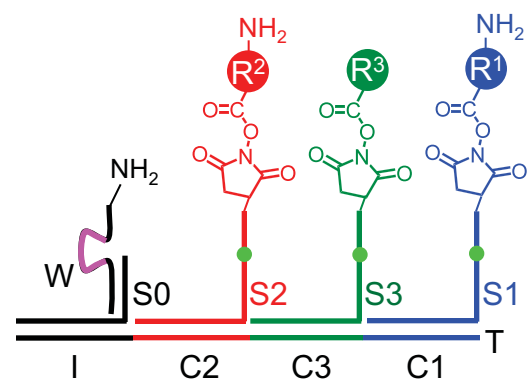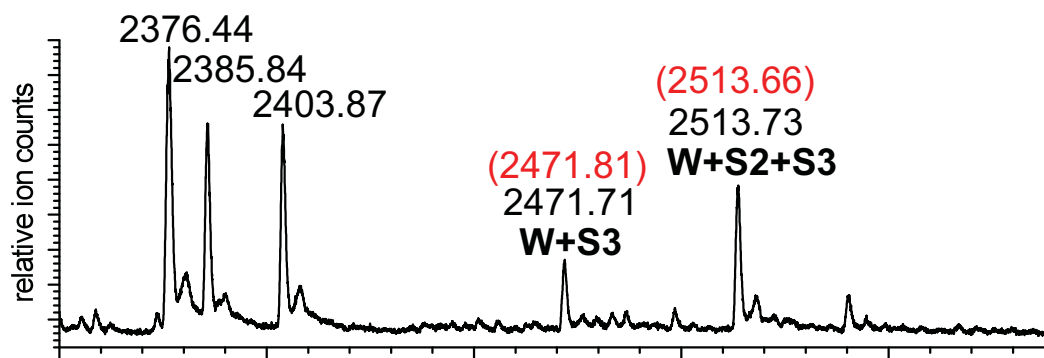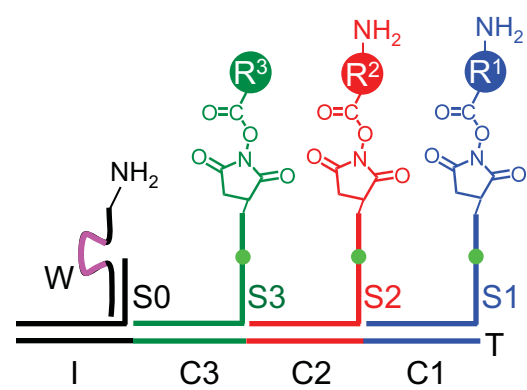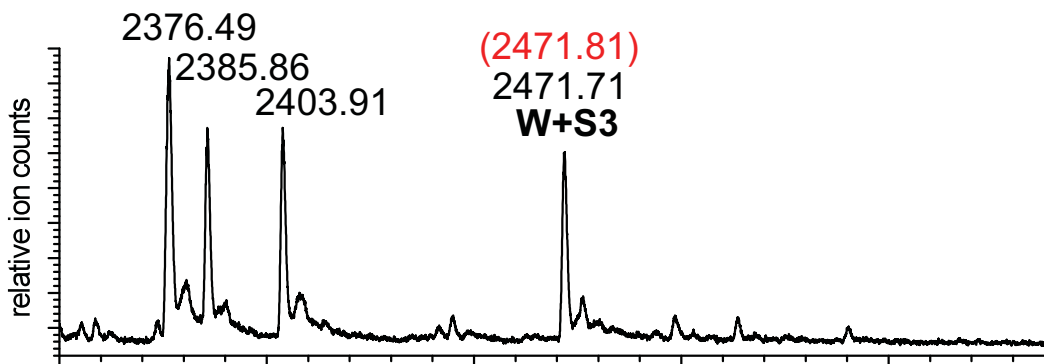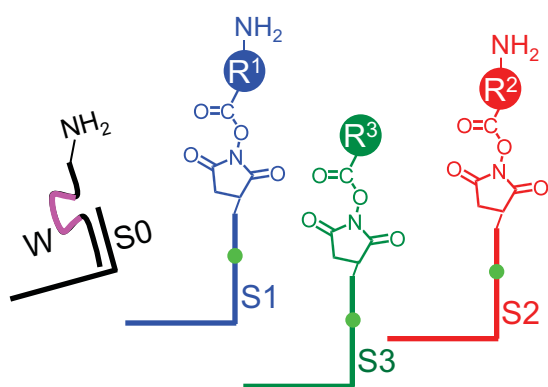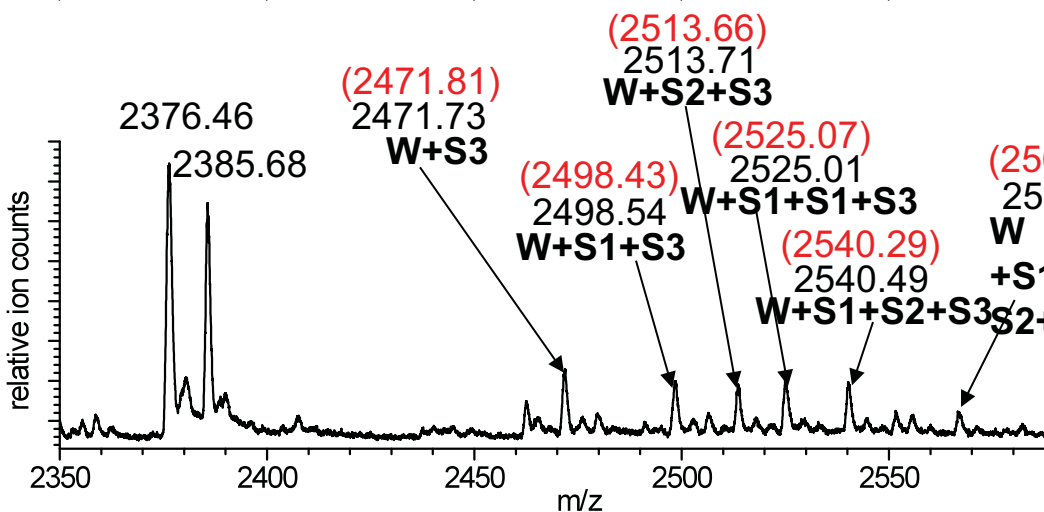

Supplement: NIHMS231238-supplement-2.pdf [file NIHMS231238-supplement-2.pdf]
